# Supplementary material for: Chemical and Functional Characterization of Extracts from Leaves and Twigs of Acacia dealbata
Source: MDPI journal article supplement (doi:10.3390/pr10112429), 2022-11-17
Supplement: s1 [file s1]

## Supplementary Material

# Chemical and Functional Characterization of Extracts from Leaves and Twigs of *Acacia dealbata*

Ricardo Correia <sup>1</sup>, Maria Paula Duarte <sup>1</sup>, Elisabete Muchagato Maurício <sup>2</sup>, João Brinco <sup>3</sup>, José Carlos Quintela <sup>4</sup>, Marco Gomes da Silva <sup>5</sup> and Margarida Gonçalves <sup>1,6,\*</sup>

- <sup>1</sup> METRICs/NOVA School of Science and Technology, Universidade NOVA de Lisboa, Campus de Caparica, 2829-516 Caparica, Portugal  
<sup>2</sup> Faculty of Engineering/CBIOS, Universidade Lusófona, 1749-024 Lisboa, Portugal  
<sup>3</sup> CENSE-Center for Environmental and Sustainability Research & CHANGE—Global Change and Sustainability Institute, NOVA School of Science and Technology, Universidade NOVA de Lisboa, Campus de Caparica, 2829-516 Caparica, Portugal  
<sup>4</sup> Natac Biotech, C/Electrónica 7, 28923 Alcorcón, Madrid, Spain  
<sup>5</sup> LAQV/REQUIMTE, Department of Chemistry, NOVA School of Science and Technology, Universidade NOVA de Lisboa, Campus de Caparica, 2829-516 Caparica, Portugal  
<sup>6</sup> VALORIZA-Research Center for Endogenous Resource Valorization, Polytechnic Institute of Portalegre, 7300-555 Portalegre, Portugal  
\* Correspondence: mmpg@fct.unl.pt

**Table S1.** TPC (mg GAE/g of biomass, wet basis), TFC (mg CatE/g of biomass, wet basis), and antioxidant activity by DPPH (mg TE/g of biomass) and FRAP ( $\mu\text{mol Fe}^{2+}$ /g of biomass) of extracts from fresh and dried leaves and twigs from Alcobaça and Caparica, using different extraction solvents and extraction methods.

| Samples       |             | Maceration at room temperature |              |              | Hot extraction |              |              |
|---------------|-------------|--------------------------------|--------------|--------------|----------------|--------------|--------------|
|               |             | 70% ACE                        | 70% ET       | 70% MET      | 70% ACE        | 70% ET       | 70% MET      |
| <b>Leaves</b> |             |                                |              |              |                |              |              |
| TPC           | Fresh (ALC) | 54.6 ± 0.7                     | 36.6 ± 0.7   | 38.2 ± 0.5   | 52.2 ± 0.9     | 39.8 ± 0.9   | 33.3 ± 1.0   |
|               | Fresh (CAP) | 36.2 ± 1.1                     | 29.7 ± 0.6   | 28.2 ± 0.7   | 41.1 ± 0.4     | 31.8 ± 0.6   | 31.1 ± 1.5   |
|               | Dried (ALC) | 70.7 ± 0.2                     | 46.7 ± 0.8   | 47.4 ± 0.7   | 71.2 ± 1.1     | 48.8 ± 0.5   | 45.5 ± 0.3   |
|               | Dried (CAP) | 48.9 ± 0.4                     | 41.7 ± 0.5   | 34.5 ± 0.5   | 54.9 ± 0.5     | 43.0 ± 0.5   | 42.9 ± 0.5   |
| TFC           | Fresh (ALC) | 12.0 ± 0.3                     | 8.8 ± 0.2    | 8.7 ± 0.3    | 11.1 ± 0.3     | 9.2 ± 0.3    | 7.7 ± 0.3    |
|               | Fresh (CAP) | 9.9 ± 0.4                      | 9.8 ± 0.2    | 8.7 ± 0.3    | 12.4 ± 0.2     | 9.5 ± 0.3    | 9.5 ± 0.2    |
|               | Dried (ALC) | 17.0 ± 0.2                     | 11.9 ± 0.3   | 11.5 ± 0.2   | 16.3 ± 0.3     | 11.9 ± 0.2   | 11.3 ± 0.3   |
|               | Dried (CAP) | 14.7 ± 0.3                     | 13.1 ± 0.2   | 10.7 ± 0.2   | 15.8 ± 0.3     | 13.2 ± 0.3   | 12.5 ± 0.2   |
| TPrAC         | Fresh (ALC) | 40.2 ± 0.7                     | 20.8 ± 0.6   | 23.7 ± 0.9   | 35.7 ± 0.9     | 21.1 ± 0.8   | 20.9 ± 1.0   |
|               | Fresh (CAP) | 26.7 ± 1.0                     | 14.1 ± 0.6   | 11.7 ± 0.6   | 30.7 ± 0.7     | 13.9 ± 0.6   | 14.5 ± 0.7   |
|               | Dried (ALC) | 52.8 ± 0.8                     | 28.9 ± 0.7   | 26.7 ± 1.1   | 52.4 ± 0.9     | 32.6 ± 1.2   | 30.9 ± 0.7   |
|               | Dried (CAP) | 39.0 ± 0.9                     | 30.1 ± 0.9   | 18.1 ± 0.6   | 43.6 ± 1.1     | 27.6 ± 1.2   | 30.1 ± 1.0   |
| DPPH          | Fresh (ALC) | 90.0 ± 0.8                     | 64.5 ± 0.5   | 62.3 ± 0.7   | 90.3 ± 0.9     | 70.2 ± 1.1   | 52.1 ± 1.0   |
|               | Fresh (CAP) | 58.6 ± 0.6                     | 34.9 ± 0.8   | 32.9 ± 1.0   | 66.3 ± 0.5     | 42.0 ± 0.5   | 38.9 ± 0.5   |
|               | Dried (ALC) | 132.1 ± 0.8                    | 83.1 ± 1.3   | 81.4 ± 0.6   | 140.1 ± 1.8    | 85.5 ± 1.8   | 88.9 ± 1.1   |
|               | Dried (CAP) | 62.4 ± 0.7                     | 58.8 ± 1.1   | 45.6 ± 0.8   | 91.7 ± 0.8     | 61.9 ± 0.8   | 61.8 ± 0.8   |
| FRAP          | Fresh (ALC) | 931.2 ± 15.2                   | 678.1 ± 16.2 | 653.2 ± 10.1 | 939.1 ± 14.8   | 716.8 ± 19.4 | 536.7 ± 18.4 |
|               | Fresh (CAP) | 691.6 ± 7.5                    | 440.0 ± 15.6 | 431.6 ± 19.5 | 738.8 ± 17.1   | 497.5 ± 15.8 | 478.0 ± 13.7 |
|               | Dried (ALC) | 1313.5 ± 21.8                  | 904.9 ± 10.5 | 753.0 ± 11.4 | 1100.6 ± 17.4  | 831.9 ± 12.8 | 427.9 ± 10.0 |
|               | Dried (CAP) | 817.0 ± 11.7                   | 692.6 ± 11.6 | 532.1 ± 11.7 | 897.9 ± 17.1   | 646.4 ± 16.6 | 676.0 ± 13.0 |
| <b>Twigs</b>  |             |                                |              |              |                |              |              |
| TPC           | Fresh (ALC) | 41.4 ± 0.8                     | 28.1 ± 0.6   | 24.1 ± 0.7   | 46.4 ± 0.6     | 35.1 ± 0.6   | 32.2 ± 0.4   |
|               | Fresh (CAP) | 30.1 ± 0.8                     | 19.8 ± 0.7   | 19.3 ± 0.5   | 30.2 ± 0.7     | 26.3 ± 0.4   | 22.7 ± 0.3   |

|              |             |              |              |              |              |              |             |
|--------------|-------------|--------------|--------------|--------------|--------------|--------------|-------------|
|              | Dried (ALC) | 59.9 ± 0.9   | 41.8 ± 0.5   | 34.7 ± 0.6   | 42.9 ± 0.3   | 29.1 ± 0.3   | 40.7 ± 1.1  |
|              | Dried (CAP) | 37.6 ± 0.7   | 26.9 ± 0.5   | 25.4 ± 0.6   | 37.4 ± 0.2   | 28.3 ± 0.3   | 31.8 ± 0.3  |
| <i>TFC</i>   | Fresh (ALC) | 13.1 ± 0.3   | 9.6 ± 0.4    | 9.1 ± 0.2    | 15.0 ± 0.2   | 11.5 ± 0.2   | 10.4 ± 0.3  |
|              | Fresh (CAP) | 13.0 ± 0.2   | 9.9 ± 0.3    | 9.2 ± 0.2    | 12.6 ± 0.3   | 11.7 ± 0.3   | 10.1 ± 0.2  |
|              | Dried (ALC) | 20.0 ± 0.3   | 15.3 ± 0.2   | 14.1 ± 0.2   | 14.5 ± 0.2   | 9.9 ± 0.2    | 14.2 ± 0.3  |
|              | Dried (CAP) | 17.8 ± 0.4   | 13.0 ± 0.2   | 12.5 ± 0.2   | 17.7 ± 0.2   | 13.2 ± 0.2   | 14.4 ± 0.4  |
| <i>TprAC</i> | Fresh (ALC) | 46.0 ± 0.4   | 21.3 ± 0.4   | 19.9 ± 0.8   | 49.9 ± 0.7   | 31.3 ± 0.7   | 29.7 ± 0.9  |
|              | Fresh (CAP) | 32.1 ± 0.3   | 6.4 ± 0.5    | 5.1 ± 0.5    | 31.9 ± 0.6   | 16.0 ± 0.8   | 9.9 ± 0.6   |
|              | Dried (ALC) | 69.2 ± 0.9   | 36.5 ± 0.7   | 32.2 ± 0.7   | 45.7 ± 0.7   | 24.8 ± 0.5   | 38.8 ± 0.8  |
|              | Dried (CAP) | 56.6 ± 0.9   | 32.9 ± 0.7   | 30.9 ± 0.8   | 54.1 ± 0.9   | 34.7 ± 0.6   | 41.1 ± 0.7  |
| <i>DPPH</i>  | Fresh (ALC) | 78.3 ± 1.2   | 52.3 ± 0.6   | 35.4 ± 1.2   | 89.6 ± 1.3   | 64.9 ± 0.5   | 60.0 ± 1.1  |
|              | Fresh (CAP) | 49.3 ± 1.1   | 17.1 ± 0.7   | 16.2 ± 0.8   | 49.0 ± 1.5   | 29.0 ± 0.6   | 25.1 ± 0.5  |
|              | Dried (ALC) | 128.3 ± 1.3  | 71.4 ± 1.0   | 54.3 ± 0.8   | 86.1 ± 0.6   | 55.8 ± 0.7   | 79.0 ± 0.6  |
|              | Dried (CAP) | 65.6 ± 1.0   | 36.2 ± 1.1   | 32.5 ± 1.2   | 62.5 ± 0.6   | 39.4 ± 0.5   | 43.0 ± 0.4  |
| <i>FRAP</i>  | Fresh (ALC) | 538.3 ± 11.4 | 452.4 ± 14.3 | 276.5 ± 7.0  | 705.5 ± 6.5  | 570.9 ± 16.6 | 502.7 ± 4.9 |
|              | Fresh (CAP) | 507.0 ± 5.2  | 223.0 ± 10.7 | 216.7 ± 8.1  | 509.1 ± 8.9  | 352.7 ± 15.1 | 312.0 ± 5.6 |
|              | Dried (ALC) | 1103.9 ± 9.6 | 511.9 ± 6.6  | 399.4 ± 8.2  | 777.8 ± 5.7  | 493.1 ± 6.7  | 716.9 ± 9.2 |
|              | Dried (CAP) | 695.7 ± 18.4 | 463.2 ± 16.9 | 400.9 ± 11.1 | 704.2 ± 10.6 | 463.5 ± 9.4  | 515.7 ± 7.0 |

Values (mean ± standard deviation) are average of two replicates of each sample, analyzed individually in triplicate ( $n = 2 \times 3$ ).

**Table S2.** Extraction yield, TPC, and DPPH values for different times of maceration at room temperature, of plants collected in Caparica using 70% ACE as extraction solvent.

|               |      | <i>Yield</i><br>(%, wet basis) | <i>TPC</i><br>(mg GAE/g<br>extract) | <i>TPC</i><br>(mg GAE/g of<br>biomass) | <i>DPPH</i><br>(mg TE/g extract) | <i>DPPH</i><br>(mg TE/g of biomass) |
|---------------|------|--------------------------------|-------------------------------------|----------------------------------------|----------------------------------|-------------------------------------|
| <b>Leaves</b> |      |                                |                                     |                                        |                                  |                                     |
| <i>TFC</i>    | 12 h | 9.2 ± 0.2                      | 333.7 ± 4.3                         | 30.5 ± 0.6                             | 537.5 ± 8.1                      | 49.2 ± 0.7                          |
|               | 24 h | 9.9 ± 0.1                      | 340.1 ± 1.8                         | 33.5 ± 0.2                             | 544.2 ± 8.5                      | 53.6 ± 1.0                          |
|               | 48 h | 10.5 ± 0.2                     | 345.8 ± 4.0                         | 36.2 ± 1.1                             | 560.0 ± 7.2                      | 58.6 ± 0.6                          |
|               | 96 h | 10.6 ± 0.2                     | 344.3 ± 4.8                         | 36.6 ± 0.8                             | 561.8 ± 10.1                     | 59.7 ± 0.6                          |
| <b>Twigs</b>  |      |                                |                                     |                                        |                                  |                                     |
| <i>TFC</i>    | 12 h | 6.8 ± 0.1                      | 369.1 ± 4.0                         | 24.9 ± 0.5                             | 598.1 ± 18.5                     | 40.4 ± 1.6                          |
|               | 24 h | 7.3 ± 0.1                      | 412.6 ± 6.7                         | 30.1 ± 0.8                             | 675.5 ± 11.0                     | 49.3 ± 1.1                          |
|               | 48 h | 7.5 ± 0.1                      | 395.4 ± 3.6                         | 29.6 ± 0.6                             | 674.4 ± 7.6                      | 50.4 ± 1.2                          |
|               | 96 h | 7.5 ± 0.1                      | 385.9 ± 4.7                         | 28.8 ± 0.4                             | 638.9 ± 18.6                     | 47.7 ± 1.4                          |

**Table S3.** TFC (mg RE/g extract, wet basis) of extracts from fresh and dried leaves and twigs from Alcobaça and Caparica, using different extraction solvents and extraction methods.

| Samples |             | Maceration at room temperature |              |              | Hot extraction |              |              |
|---------|-------------|--------------------------------|--------------|--------------|----------------|--------------|--------------|
|         |             | 70% ACE                        | 70% ET       | 70% MET      | 70% ACE        | 70% ET       | 70% MET      |
| Leaves  |             |                                |              |              |                |              |              |
| TFC     | Fresh (ALC) | 299.7 ± 7.6                    | 247.2 ± 7.7  | 228.8 ± 7.7  | 275.3 ± 9.3    | 252.5 ± 10.3 | 236.3 ± 9.9  |
|         | Fresh (CAP) | 288.3 ± 7.2                    | 296.8 ± 10.2 | 271.3 ± 11.1 | 323.2 ± 8.4    | 293.6 ± 11.7 | 290.9 ± 8.6  |
|         | Dried (ALC) | 348.0 ± 6.1                    | 250.9 ± 5.5  | 247.7 ± 3.8  | 312.9 ± 4.6    | 267.6 ± 5.4  | 264.0 ± 5.7  |
|         | Dried (CAP) | 319.5 ± 5.3                    | 279.3 ± 5.5  | 239.3 ± 6.8  | 306.7 ± 8.5    | 253.5 ± 6.8  | 249.1 ± 5.9  |
| Twigs   |             |                                |              |              |                |              |              |
| TFC     | Fresh (ALC) | 504.4 ± 12.9                   | 422.3 ± 12.0 | 397.6 ± 6.53 | 504.5 ± 11.7   | 417.7 ± 10.1 | 410.9 ± 7.9  |
|         | Fresh (CAP) | 542.3 ± 14.1                   | 447.8 ± 7.1  | 394.9 ± 11.6 | 464.3 ± 8.6    | 465.2 ± 7.4  | 439.7 ± 13.5 |
|         | Dried (ALC) | 504.1 ± 9.2                    | 433.9 ± 10.4 | 406.0 ± 6.1  | 496.8 ± 5.2    | 424.2 ± 8.4  | 427.6 ± 8.8  |
|         | Dried (CAP) | 601.4 ± 8.3                    | 454.5 ± 9.9  | 375.5 ± 7.3  | 609.5 ± 5.6    | 484.2 ± 4.1  | 459.6 ± 8.2  |

**Table S4.** TFC (mg RutE/g of raw material, wet basis) of extracts from fresh and dried leaves and twigs from Alcobaça and Caparica, using different extraction solvents and extraction methods.

| Samples       |               | Maceration at room temperature |            |            | Hot extraction |            |             |
|---------------|---------------|--------------------------------|------------|------------|----------------|------------|-------------|
|               |               | 70% ACE                        | 70% ET     | 70% MET    | 70% ACE        | 70% ET     | 70% MET     |
| <b>Leaves</b> |               |                                |            |            |                |            |             |
| TF            | Fresh (ALC)   | 36.4 ± 0.7                     | 26.7 ± 0.7 | 26.6 ± 0.8 | 33.6 ± 1.0     | 27.8 ± 1.0 | 23.34 ± 0.8 |
|               | Fresh (CAP)   | 30.2 ± 1.1                     | 29.7 ± 0.6 | 26.6 ± 0.8 | 37.7 ± 0.7     | 28.8 ± 0.9 | 28.8 ± 0.5  |
|               | C Dried (ALC) | 51.4 ± 0.7                     | 36.0 ± 1.0 | 35.0 ± 0.7 | 49.5 ± 0.8     | 36.0 ± 0.6 | 34.2 ± 2.9  |
|               | Dried (CAP)   | 44.6 ± 1.0                     | 39.8 ± 1.0 | 32.3 ± 0.7 | 47.8 ± 1.0     | 40.0 ± 0.9 | 37.8 ± 0.7  |
| <b>Twigs</b>  |               |                                |            |            |                |            |             |
| TF            | Fresh (ALC)   | 39.6 ± 1.0                     | 29.2 ± 1.7 | 27.6 ± 0.7 | 45.5 ± 0.7     | 34.8 ± 0.7 | 31.5 ± 0.8  |
|               | Fresh (CAP)   | 39.5 ± 0.6                     | 30.2 ± 0.8 | 27.8 ± 0.5 | 38.2 ± 0.9     | 35.5 ± 0.8 | 30.8 ± 0.5  |
|               | C Dried (ALC) | 60.5 ± 0.9                     | 46.6 ± 0.7 | 42.9 ± 0.7 | 43.9 ± 0.6     | 29.9 ± 0.6 | 43.2 ± 1.0  |
|               | Dried (CAP)   | 54.0 ± 1.3                     | 39.3 ± 0.6 | 37.9 ± 0.6 | 53.6 ± 0.6     | 40.2 ± 0.6 | 43.7 ± 1.1  |

**Table S5.** Average values of extraction yield (% wet basis), TPC (mg GAE/g extract), TFC (mg CatE/g extract) and TPrAC (mg PycE/g extract) for extracts obtained by maceration and hot extraction (regardless of drying status and origin), from fresh and dried material (regardless extraction method and origin), and from plants from Alcobaça and Caparica (regardless extraction process and drying status).

| Samples           | Leaves                  |                          |                         | Twigs                   |                         |                         |
|-------------------|-------------------------|--------------------------|-------------------------|-------------------------|-------------------------|-------------------------|
|                   | 70% ACE                 | 70% ET                   | 70% MET                 | 70% ACE                 | 70% ET                  | 70% MET                 |
| <i>Yield</i>      |                         |                          |                         |                         |                         |                         |
| Maceration        | 12.8 ± 1.7 <sup>a</sup> | 12.4 ± 2.0 <sup>a</sup>  | 12.3 ± 1.8 <sup>a</sup> | 9.0 ± 1.9 <sup>a</sup>  | 8,3 ± 1.7 <sup>a</sup>  | 8.7 ± 1.7 <sup>a</sup>  |
| Hot<br>extraction | 13.8 ± 2.0 <sup>a</sup> | 12.5 ± 2.4 <sup>a</sup>  | 12.0 ± 2.3 <sup>a</sup> | 8.7 ± 0.3 <sup>a</sup>  | 7.8 ± 0.5 <sup>a</sup>  | 8.6 ± 1.3 <sup>a</sup>  |
| Fresh             | 11.6 ± 0.7 <sup>c</sup> | 10.4 ± 0.5 <sup>d</sup>  | 10.3 ± 0.8 <sup>d</sup> | 8.1 ± 0.6 <sup>bc</sup> | 7.4 ± 0.7 <sup>cd</sup> | 7.2 ± 0.3 <sup>d</sup>  |
| Dried             | 15.0 ± 0.7 <sup>a</sup> | 14.5 ± 0.9 <sup>ab</sup> | 13.9 ± 0.9 <sup>b</sup> | 9.7 ± 1.4 <sup>a</sup>  | 8.7 ± 1.4 <sup>b</sup>  | 10.1 ± 0.4 <sup>a</sup> |
| Alcobaça          | 13.7 ± 1.7 <sup>a</sup> | 12.4 ± 1.6 <sup>a</sup>  | 12.2 ± 1.6 <sup>a</sup> | 9.4 ± 1.6 <sup>a</sup>  | 8.3 ± 1.6 <sup>ab</sup> | 8.8 ± 1.6 <sup>ab</sup> |
| Caparica          | 12.9 ± 2.1 <sup>a</sup> | 12.5 ± 2.7 <sup>a</sup>  | 12.1 ± 2.4 <sup>a</sup> | 8.3 ± 0.7 <sup>ab</sup> | 7.8 ± 0.8 <sup>b</sup>  | 8.4 ± 1.5 <sup>ab</sup> |
| <i>TPC</i>        |                         |                          |                         |                         |                         |                         |

|                |                           |                            |                            |                            |                             |                            |
|----------------|---------------------------|----------------------------|----------------------------|----------------------------|-----------------------------|----------------------------|
| Maceration     | 405.8 ± 60.3 <sup>a</sup> | 312.95 ± 20.7 <sup>b</sup> | 302.1 ± 33.7 <sup>b</sup>  | 464.3 ± 50.7 <sup>a</sup>  | 350.3 ± 49.8 <sup>b</sup>   | 300.6 ± 40.7 <sup>c</sup>  |
| Hot extraction | 396.1 ± 45.3 <sup>a</sup> | 330.1 ± 37.8 <sup>b</sup>  | 321.3 ± 27.6 <sup>b</sup>  | 448.1 ± 58.2 <sup>a</sup>  | 379.9 ± 38.0 <sup>b</sup>   | 370.2 ± 42.5 <sup>b</sup>  |
| Fresh          | 394.0 ± 46.7 <sup>a</sup> | 330.1 ± 25.1 <sup>b</sup>  | 317.2 ± 19.8 <sup>b</sup>  | 455.2 ± 69.0 <sup>a</sup>  | 366.6 ± 51.9 <sup>b</sup>   | 341.3 ± 53.8 <sup>b</sup>  |
| Dried          | 408.0 ± 58.8 <sup>a</sup> | 313.0 ± 35.0 <sup>b</sup>  | 306.2 ± 40.1 <sup>b</sup>  | 457.2 ± 36.5 <sup>a</sup>  | 363.6 ± 41.0 <sup>b</sup>   | 329.5 ± 54.9 <sup>b</sup>  |
| Alcobaça       | 451.6 ± 18.8 <sup>a</sup> | 346.8 ± 16.7 <sup>b</sup>  | 338.3 ± 10.0 <sup>b</sup>  | 506.4 ± 16.2 <sup>a</sup>  | 407.4 ± 12.8 <sup>b</sup>   | 374.8 ± 38.5 <sup>c</sup>  |
| Caparica       | 350.3 ± 5.5 <sup>b</sup>  | 296.2 ± 20.0 <sup>c</sup>  | 285.1 ± 22.2 <sup>c</sup>  | 406.0 ± 23.9 <sup>b</sup>  | 322.9 ± 22.3 <sup>d</sup>   | 296.0 ± 35.6 <sup>e</sup>  |
| <b>TFC</b>     |                           |                            |                            |                            |                             |                            |
| Maceration     | 103.5 ± 8.0 <sup>a</sup>  | 88.5 ± 7.3 <sup>b</sup>    | 81.3 ± 5.8 <sup>c</sup>    | 177.4 ± 13.9 <sup>a</sup>  | 144.8 ± 5.2 <sup>b</sup>    | 129.6 ± 4.5 <sup>c</sup>   |
| Hot extraction | 100.4 ± 6.5 <sup>a</sup>  | 87.9 ± 6.2 <sup>b</sup>    | 85.7 ± 7.2 <sup>bc</sup>   | 171.0 ± 18.6 <sup>a</sup>  | 147.5 ± 9.7 <sup>b</sup>    | 143.1 ± 6.6 <sup>b</sup>   |
| Fresh          | 97.7 ± 6.5 <sup>b</sup>   | 89.7 ± 8.3 <sup>c</sup>    | 84.5 ± 9.0 <sup>cd</sup>   | 166.0 ± 10.0 <sup>b</sup>  | 144.3 ± 7.1 <sup>cd</sup>   | 135.2 ± 6.8 <sup>e</sup>   |
| Dried          | 106.1 ± 5.7 <sup>a</sup>  | 86.7 ± 4.3 <sup>cd</sup>   | 82.4 ± 3.5 <sup>d</sup>    | 182.4 ± 17.9 <sup>a</sup>  | 148.0 ± 8.2 <sup>c</sup>    | 137.5 ± 10.6 <sup>de</sup> |
| Alcobaça       | 101.9 ± 9.2 <sup>a</sup>  | 83.9 ± 3.5 <sup>cd</sup>   | 80.4 ± 5.0 <sup>d</sup>    | 165.6 ± 3.3 <sup>b</sup>   | 139.9 ± 3.8 <sup>d</sup>    | 135.2 ± 4.3 <sup>d</sup>   |
| Caparica       | 102.0 ± 5.2 <sup>a</sup>  | 92.5 ± 6.3 <sup>b</sup>    | 86.5 ± 7.2 <sup>c</sup>    | 182.8 ± 19.9 <sup>a</sup>  | 152.5 ± 5.2 <sup>c</sup>    | 137.5 ± 11.8 <sup>d</sup>  |
| <b>TprAC</b>   |                           |                            |                            |                            |                             |                            |
| Maceration     | 305.6 ± 41.6 <sup>a</sup> | 186.3 ± 28.5 <sup>bc</sup> | 161.6 ± 36.9 <sup>c</sup>  | 558.5 ± 73.3 <sup>a</sup>  | 280.5 ± 113.2 <sup>bc</sup> | 242.5 ± 101.0 <sup>c</sup> |
| Hot extraction | 291.9 ± 26.6 <sup>a</sup> | 187.5 ± 37.5 <sup>bc</sup> | 198.6 ± 34.7 <sup>b</sup>  | 518.2 ± 84.8 <sup>a</sup>  | 338.2 ± 80.2 <sup>b</sup>   | 336.7 ± 116.6 <sup>b</sup> |
| Fresh          | 285.6 ± 31.0 <sup>a</sup> | 166.4 ± 26.6 <sup>c</sup>  | 170.4 ± 39.9 <sup>c</sup>  | 491.9 ± 82.7 <sup>b</sup>  | 246.5 ± 108.4 <sup>d</sup>  | 222.1 ± 125.8 <sup>d</sup> |
| Dried          | 311.9 ± 34.8 <sup>a</sup> | 207.4 ± 25.3 <sup>b</sup>  | 189.8 ± 38.6 <sup>bc</sup> | 584.7 ± 45.4 <sup>a</sup>  | 372.2 ± 31.6 <sup>c</sup>   | 357.0 ± 55.7 <sup>c</sup>  |
| Alcobaça       | 328.0 ± 24.5 <sup>a</sup> | 206.7 ± 22.1 <sup>c</sup>  | 210.7 ± 19.6 <sup>c</sup>  | 558.1 ± 28.1 <sup>a</sup>  | 343.5 ± 25.9 <sup>b</sup>   | 340.9 ± 47.4 <sup>b</sup>  |
| Caparica       | 269.6 ± 12.3 <sup>b</sup> | 167.1 ± 30.3 <sup>d</sup>  | 149.5 ± 30.7 <sup>d</sup>  | 518.6 ± 108.6 <sup>a</sup> | 275.2 ± 133.7 <sup>bc</sup> | 238.2 ± 143.8 <sup>c</sup> |

Different letters indicate significant differences of means within samples for each set of parameters (one-way ANOVA, Tukey test at p<0.05).

**Table S6.** Chromatographic peak areas of non-polar components co-extracted with phenolic compounds for a group of selected extracts obtained by maceration at room temperature.

| Extraction Solvent            |                                  | 70%<br>ACE        | 70%<br>ACE        | 70%<br>MET        | 70%<br>ET         | 70%<br>ACE         | 70%<br>ACE         | 70%<br>ACE         |
|-------------------------------|----------------------------------|-------------------|-------------------|-------------------|-------------------|--------------------|--------------------|--------------------|
| Status                        |                                  | Dried             | Dried             | Dried             | Dried             | Fresh              | Dried              | Dried              |
| Biomass / Geographical Origin |                                  | Twigs<br>Alcobaça | Twigs<br>Alcobaça | Twigs<br>Alcobaça | Twigs<br>Alcobaça | Leaves<br>Alcobaça | Leaves<br>Alcobaça | Leaves<br>Caparica |
| Peak<br>Nº                    | Compound Name                    |                   |                   |                   |                   |                    |                    |                    |
| 1                             | Neophytadiene                    | 3870564           | 2506597           | 2890708           | 2618226           | 18259744           | 27923663           | 41468761           |
| 2                             | 6,10-dimethyl-2-Undecanone       | 8158101           | 2564086           | 4494088           | 3725733           | 7331571            | 10800282           | 8370053            |
| 3                             | Tetramethyl-2-hexadecen-1-ol     | 1201880           | 5812381           | 1066436           | 11693842          | -                  | 7938807            | 11693842           |
| 4                             | 1-Hexadecanol                    | 87416039          | 25671111          | 66275268          | -                 | 24259269           | 100999797          | 88173650           |
| 5                             | 6-Dodecanone                     | 1727458           | 5261270           | 7875074           | 10994683          | 916754             | 18323890           | 4763041            |
| 6                             | Methyl hexadecanoate             | 4148491           | 6833789           | 3.63E+08          | 4951273           | 6613855            | 19613167           | 8733044            |
| 7                             | 1-Hexadecanol (TMS derivative)   | 85956786          | 48164147          | 70724059          | 47115507          | 42892333           | 42989469           | 35478974           |
| 8                             | Ethyl Hexadecanoate              | -                 | -                 | -                 | 4.58E+08          | -                  | 2544219            | 4242189            |
| 9                             | Palmitic Acid (TMS derivative)   | 27290494          | 2012970           | 2886685           | 6886565           | 4467915            | 7193467            | -                  |
| 10                            | 1-Octadecene                     | 64559734          | 21311256          | 37927976          | 36479409          | 19383671           | 68066659           | 55719274           |
| 11                            | Methyl-9,12-Octadecadienoate     | 905917            | -                 | 1.21E+08          | 5901530           | -                  | 2904050            | 534514             |
| 12                            | Methyl 9,12,15-Octadecatrienoate | -                 | -                 | 1.21E+08          | -                 | -                  | 5506842            | 2753922            |

|    |                                 |          |          |          |          |          |           |           |
|----|---------------------------------|----------|----------|----------|----------|----------|-----------|-----------|
| 13 | Methyl 9-Octadecenoate          | --       | -        | 35381563 | -        | -        | -         | -         |
| 14 | Phytol                          | 1.05E+08 | 39975742 | 54131526 | 54207934 | 3.65E+08 | 1.563E+09 | 1.905E+09 |
| 15 | Diallyl acetal palmitaldehyde   |          | 1073505  | 1370100  | 1933436  | 8332209  | 22549852  | 27671761  |
| 16 | 1-Octadecanol, (TMS derivative) | 78279383 | 42840515 | 58752712 | 41575022 | 35633240 | 48195737  | 26179740  |
| 17 | Methyl 9,12-Octadecadienoate    | -        | -        | 1653183  | 93285165 | -        | -         | 1005962   |
| 18 | Tri-n-butyl aconitate           | 4614209  | -        | 2782973  | -        | 15034848 | 40758680  | 112844093 |
| 19 | Ethyl Oleate                    | -        | -        | -        | 39360244 | -        | -         | --        |
| 20 | Phytol (TMS derivative)         | 1.19E+08 | 70571077 | 71045757 | 47618417 | 5.4E+08  | 934008233 | 656783661 |
| 21 | Ethyl octadecanoate             |          | -        | -        | 15659060 | -        | -         | 145600    |
| 22 | Tributyl acetylcitrate          | 1003654  | -        | -        |          | 67819179 | -         | 83457851  |
| 23 | Eicosane                        | 2559784  | 1536828  | 1314349  | 877072   | 889677   | 4193106   | 1910845   |
| 24 | Squalene                        | 13056697 | 22489185 | 5888245  | 6495633  | 12029161 | 36719498  | 110601809 |
| 25 | dl- $\alpha$ -Tocopherol        | 1817566  | 3912929  | -        | -        | 18389246 | 54634933  | 58847032  |
| 26 | Stigmasterol                    | 3126933  | 2201904  | -        | 1318946  | 1772095  | 4185504   | 3225958   |
| 27 | Olean-18-ene                    | -        | 164102   | -        | 123966   | 2483215  | 3993612   | 4295146   |
| 28 | Lupeol isomer                   | -        | 173770   | -        | -        | 3062321  | 5721073   | 5158152   |
| 29 | Lup-20(29)-en-3-one             | 2780597  | 5672836  | 2008534  | 3682556  | 8761884  | 18184112  | 9564442   |
| 30 | Lupeol                          | 2181198  | 2712110  | 1382327  | 1969921  | 8633173  | 20098838  | 10493844  |
| 31 | A'-Neogammacer-22(29)-en-3-one  | -        | 1132595  | -        | 1393234  | 536941   | 2072609   | 1198093   |
| 32 | Lupeol isomer                   | -        | 917528   | 382291   | 548299   | 1038714  | 1757054   | 5495892   |

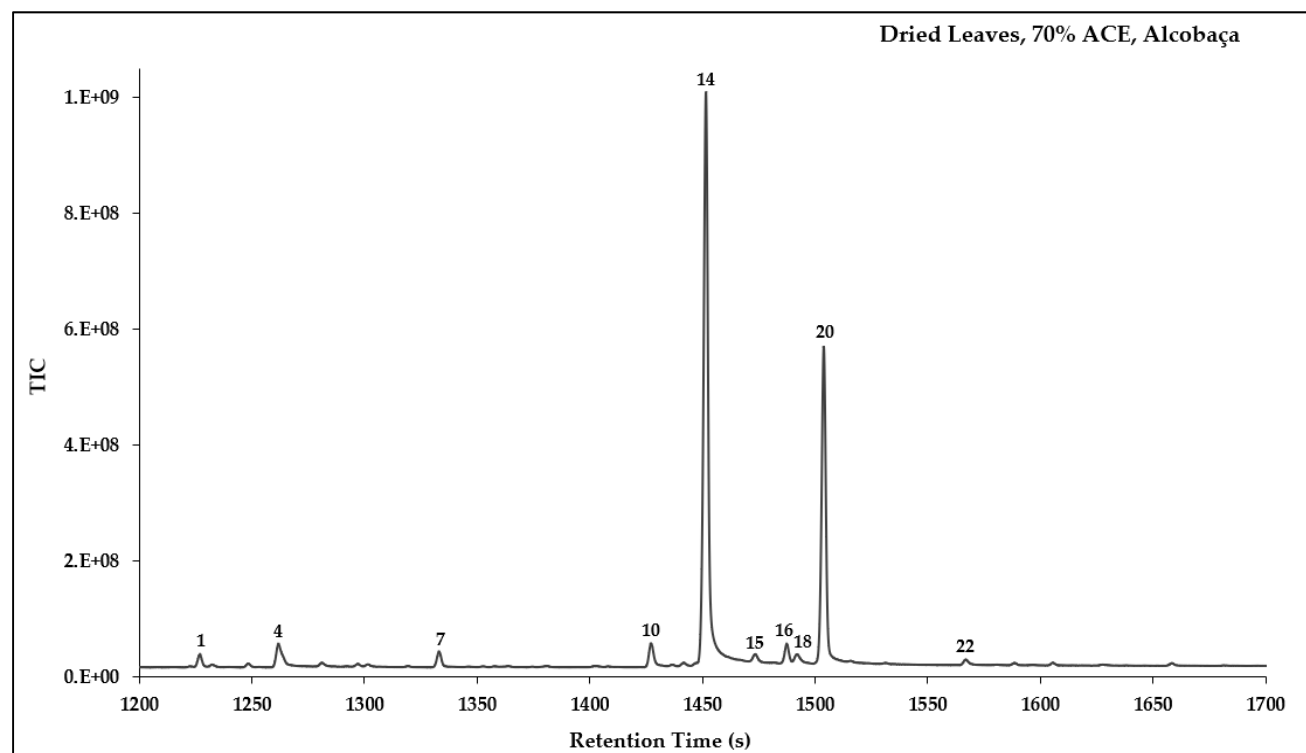

**Figure S1.** Chromatographic profile of the non-polar fraction of the extract obtained with 70% acetone by maceration of dried Acacia leaves collected in Alcobaça region. Part 1 – Low retention time components: 1. Neophytadiene; 4. 1-Hexadecanol; 7. 1-Hexadecanol (TMS derivative); 10. 1-Octadecene; 14. Phytol; 15. Diallyl acetal palmitaldehyde; 16. 1-Octadecanol, (TMS derivative) 17. Methyl 9,12-Octadecadienoate; 18. Tri-n-butyl aconitate; 20. Phytol (TMS derivative); 22. Tributyl acetylcitrate.

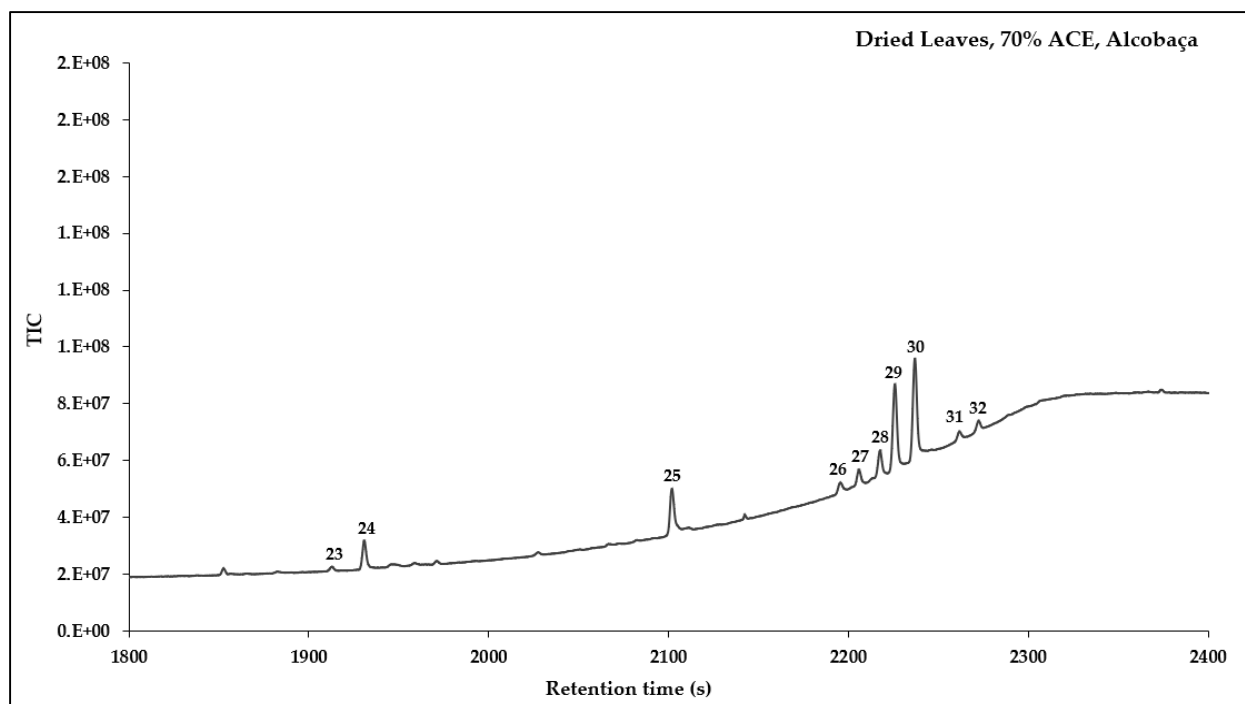

**Figure S2.** Chromatographic profile of the non-polar fraction of the extract obtained with 70% acetone by maceration of dried Acacia leaves collected in Alcobaça region. Part 2 – High retention time components: 23. Eicosane; 24. Squalene; 25. dl- $\alpha$ -Tocopherol; 26. Stigmasterol; 27. Olean-18-ene; 28. Lupeol isomer; 29. Lup-20(29)-en-3-one; 30. Lupeol; 31. A'-Neogammacer-22(29)-en-3-one; 32. Lupeol isomer.

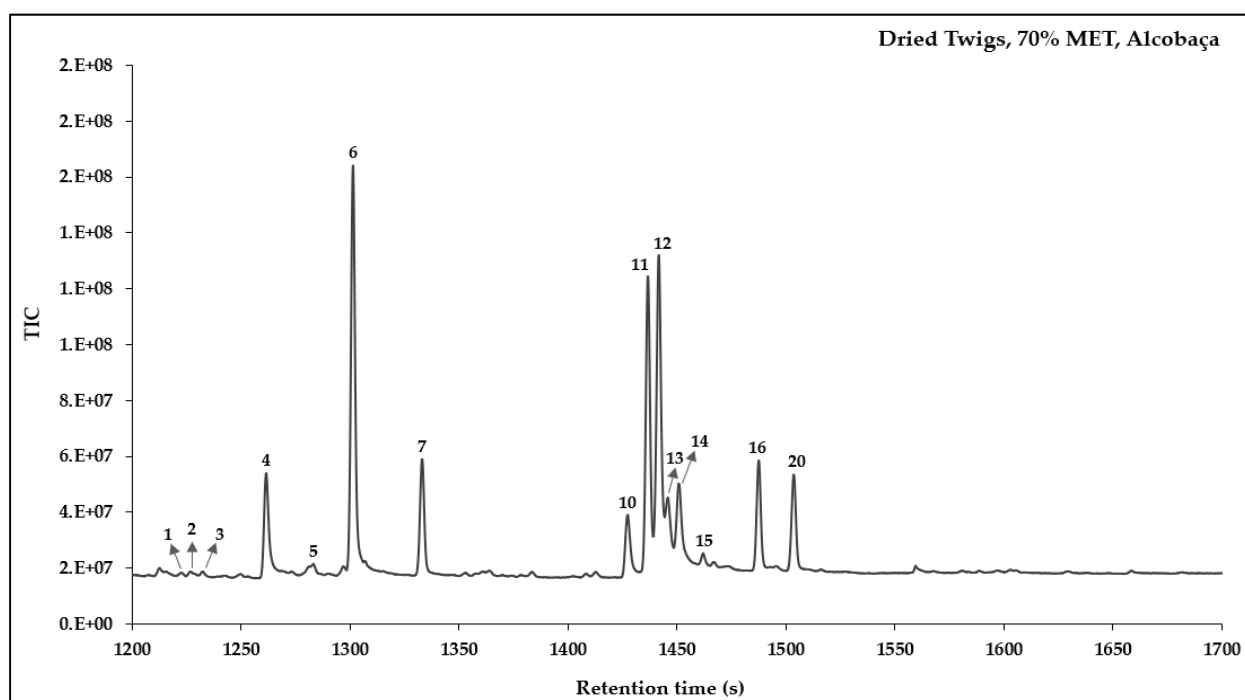

**Figure S3.** Chromatographic profile of the non-polar fraction of the extract obtained with 70% methanol by maceration of dried Acacia twigs collected in Alcobaça region. Part 1 – Low retention time components: 1. Neophytadiene; 2. 6,10-dimethyl-2-Undecanone; 3. Tetramethyl-2-hexadecen-1-ol; 4. 1-Hexadecanol; 5. 6-Dodecanone; 6. Methyl hexadecanoate; 7. 1-Hexadecanol (TMS derivative); 10. 1-Octadecene; 11. Methyl-9,12-Octadecadienoate; 12. Methyl 9,12,15-Octadecatrienoate; 13. Methyl 9-Octadecenoate; 14. Phytol; 15. Diallyl acetal palmitaldehyde; 16. 1-Octadecanol, (TMS derivative); 20. Phytol (TMS derivative).
